# Supplementary material for: Sustainable one-pot integration of ZnO nanoparticles into carbon spheres: manipulation of the morphological, optical and electrochemical properties
Source: Royal Society of Chemistry journal article supplement (doi:10.1039/c6cp05911b), 2016-01-01
Supplement: c6cp05911b1.pdf [file c6cp05911b1.pdf]

## Supplementary Information

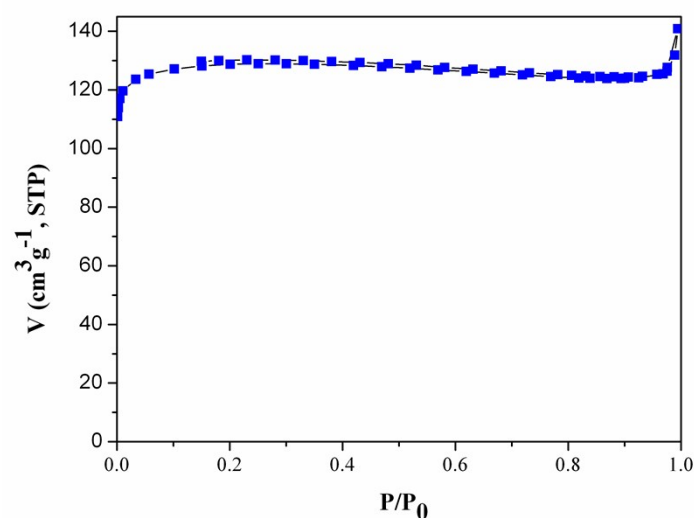

**Fig. SI1** Nitrogen adsorption-desorption isotherms of starch SC0.5 carbon spheres calcinated at 700°C/3h in argon atmosphere.

Surface area  $S_{\text{BET}} = 516.4 \text{ m}^2/\text{g}$ ; Micropore area:  $489.2 \text{ m}^2/\text{g}$

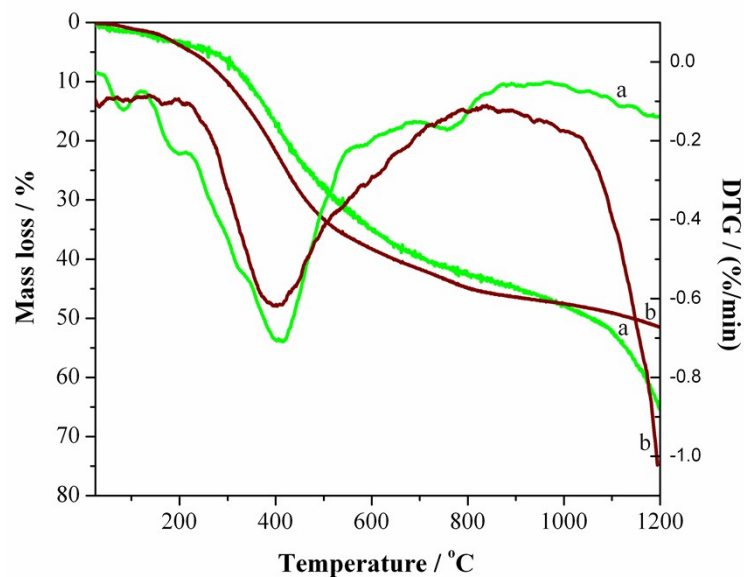

**Fig. SI2.** Thermal curves (TG and DTG) of: (a) ZnC0.005 (argon atmosphere, heating rate=5°C/min) and (b) free-zinc carbonaceous spheres SC0.1

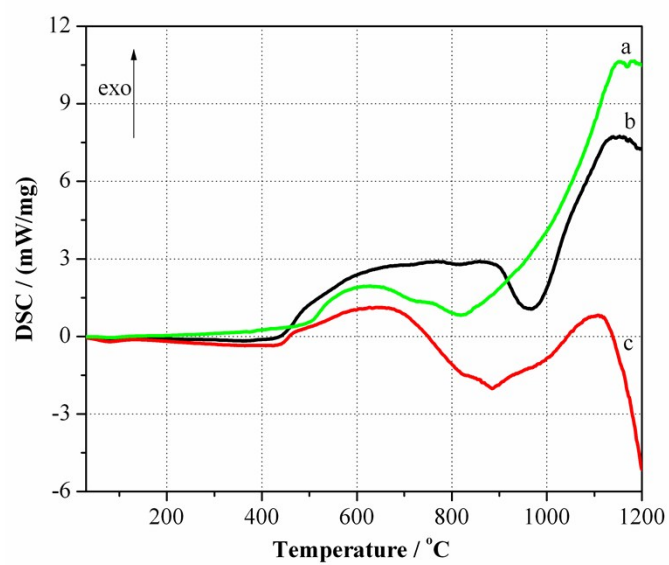

**Fig. SI3.** DSC curves of ZnOCX composites: (a) ZnOC0.005; (b) ZnOC0.1 and (c) ZnOC0.5 samples (argon atmosphere, heating rate=5°C/min).
